# Supplementary material
Source: PubMed Central journal article supplement (PMC3784004)
Supplement: NIHMS509857-supplement-01.pdf [file NIHMS509857-supplement-01.pdf]

Table 1: Maternal Characteristics by Treatment.

| Characteristic                                | Folic Acid Group |                 | Total<br>N=268 | P-Value |
|-----------------------------------------------|------------------|-----------------|----------------|---------|
|                                               | 0.4 mg<br>N=127  | 4.0 mg<br>N=141 |                |         |
| <b>Age (years)</b>                            | 125              | 141             | 266            | 0.8122  |
| < 20                                          | 17 (13.6)        | 23 (16.3)       | 40 (15.0)      |         |
| 20 - 29                                       | 78 (62.4)        | 84 (59.6)       | 162 (60.9)     |         |
| ≥ 30                                          | 30 (24.0)        | 34 (24.1)       | 64 (24.1)      |         |
| <b>Mean (SD)</b>                              | 25.5 (6.1)       | 25.3 (5.7)      | 25.4 (5.9)     | 0.7575  |
| <b>Education Level</b>                        | 115              | 134             | 249            | 0.9254  |
| <b>Fundamental</b>                            | 44 (38.3)        | 49 (36.6)       | 93 (37.3)      |         |
| <b>Intermediate</b>                           | 62 (53.9)        | 73 (54.5)       | 135 (54.2)     |         |
| <b>University +</b>                           | 9 (7.8)          | 12 (9.0)        | 21 (8.4)       |         |
| <b>Years - Mean (SD)</b>                      | 3.8 (1.9)        | 3.8 (1.9)       | 3.8 (1.9)      | 0.9862  |
| <b>Gestational Age (weeks)</b>                |                  |                 |                |         |
| <b>N</b>                                      | 127              | 140             | 267            |         |
| <b>Mean (SD)</b>                              | 34.7 (9.9)       | 35.4 (9.6)      | 35.1 (9.7)     | 0.5832  |
| <b>Body Mass Index (kg/m<sup>2</sup>)</b>     |                  |                 |                |         |
| <b>N</b>                                      | 45               | 59              | 104            |         |
| <b>Mean (SD)</b>                              | 31.3 (52.4)      | 23.0 (3.8)      | 26.6 (34.6)    | 0.2973  |
| <b>Hemoglobin (g/dl)</b>                      |                  |                 |                |         |
| <b>N</b>                                      | 45               | 58              | 103            |         |
| <b>Mean (SD)</b>                              | 12.3 (1.1)       | 12.4 (1.2)      | 12.3 (1.1)     | 0.6314  |
| <b>Anemia</b>                                 | 45               | 58              | 103            | 0.6880  |
| <b>Yes</b>                                    | 16 (35.6)        | 23 (39.7)       | 39 (37.9)      |         |
| <b>No</b>                                     | 29 (64.4)        | 35 (60.3)       | 64 (62.1)      |         |
| <b>Cigarette Smoking Prior to Pregnancy</b>   | 126              | 141             | 267            | 0.6300  |
| <b>Yes</b>                                    | 24 (19.0)        | 23 (16.3)       | 47 (17.6)      |         |
| <b>No</b>                                     | 102 (81.0)       | 118 (83.7)      | 220 (82.4)     |         |
| <b>Cigarette Smoking During Pregnancy</b>     | 120              | 134             | 254            | 0.1960  |
| <b>Yes</b>                                    | 20 (16.7)        | 14 (10.4)       | 34 (13.4)      |         |
| <b>No</b>                                     | 100 (83.3)       | 120 (89.6)      | 220 (86.6)     |         |
| <b>Alcohol Consumption Prior to Pregnancy</b> | 126              | 141             | 267            | 0.3458  |
| <b>Yes</b>                                    | 20 (15.9)        | 29 (20.6)       | 49 (18.4)      |         |
| <b>No</b>                                     | 106 (84.1)       | 112 (79.4)      | 218 (81.6)     |         |
| <b>Alcohol Consumption During Pregnancy</b>   | 120              | 134             | 254            | 0.6055  |
| <b>Yes</b>                                    | 17 (14.2)        | 23 (17.2)       | 40 (15.7)      |         |
| <b>No</b>                                     | 103 (85.8)       | 111 (82.8)      | 214 (84.3)     |         |

Note: P-values computed using a Chi-square or Fisher's Exact Test for categorical variables and a T-Test for continuous variables.

Table 1: Maternal Characteristics by Treatment (continued).

| Characteristic                            | Folic Acid Group |                 | Total<br>N=268 | P-Value |
|-------------------------------------------|------------------|-----------------|----------------|---------|
|                                           | 0.4 mg<br>N=127  | 4.0 mg<br>N=141 |                |         |
| <b>Use Multivitamins During Pregnancy</b> | 93               | 107             | 200            | 0.5707  |
| Yes                                       | 51 (54.8)        | 63 (58.9)       | 114 (57.0)     |         |
| No                                        | 42 (45.2)        | 44 (41.1)       | 86 (43.0)      |         |
| <b>Vitamin B12 (pg/mL)</b>                |                  |                 |                |         |
| N                                         | 70               | 82              | 152            |         |
| Mean (SD)                                 | 370.7 (170.8)    | 372.5 (132.1)   | 371.6 (150.6)  | 0.9431  |
| <b>Vitamin B12 &lt; 174 pg/mL</b>         | 70               | 82              | 152            | 0.2104  |
| Yes                                       | 2 (2.9)          | 0 (0.0)         | 2 (1.3)        |         |
| No                                        | 68 (97.1)        | 82 (100.0)      | 150 (98.7)     |         |
| <b>Serum Folate (ng/mL)</b>               |                  |                 |                |         |
| N                                         | 82               | 94              | 176            |         |
| Mean (SD)                                 | 15.1 (8.3)       | 15.4 (5.6)      | 15.3 (7.0)     | 0.7599  |
| <b>Red Cell Folate (ng/mL)</b>            |                  |                 |                |         |
| N                                         | 81               | 91              | 172            |         |
| Mean (SD)                                 | 693.8 (522.4)    | 762.2 (539.5)   | 730.0 (531.1)  | 0.4013  |
| <b>Marital Status</b>                     | 126              | 141             | 267            | 0.3829  |
| Single                                    | 28 (22.2)        | 30 (21.3)       | 58 (21.7)      |         |
| Married or Stable Relationship            | 97 (77.0)        | 106 (75.2)      | 203 (76.0)     |         |
| Divorced/Widowed                          | 1 (0.8)          | 5 (3.5)         | 6 (2.2)        |         |
| <b>Employed in the Past Month</b>         | 116              | 134             | 250            | 0.3749  |
| Yes                                       | 65 (56.0)        | 67 (50.0)       | 132 (52.8)     |         |
| No                                        | 51 (44.0)        | 67 (50.0)       | 118 (47.2)     |         |
| <b>Number of Children</b>                 | 126              | 141             | 267            | 0.1159  |
| 0                                         | 28 (22.2)        | 48 (34.0)       | 76 (28.5)      |         |
| 1                                         | 55 (43.7)        | 55 (39.0)       | 110 (41.2)     |         |
| 2                                         | 22 (17.5)        | 24 (17.0)       | 46 (17.2)      |         |
| ≥ 3                                       | 21 (16.7)        | 14 (9.9)        | 35 (13.1)      |         |
| Mean (SD)                                 | 1.4 (1.3)        | 1.1 (1.3)       | 1.3 (1.3)      | 0.0874  |
| <b>Frequency of Gynecological Visits</b>  | 126              | 141             | 267            | 0.8412  |
| Every 6 Months                            | 47 (37.3)        | 53 (37.6)       | 100 (37.5)     |         |
| Once a Year                               | 52 (41.3)        | 58 (41.1)       | 110 (41.2)     |         |
| Less than Once a Year                     | 15 (11.9)        | 13 (9.2)        | 28 (10.5)      |         |
| Never                                     | 12 (9.5)         | 17 (12.1)       | 29 (10.9)      |         |
| <b>Compliance</b>                         |                  |                 |                |         |
| N                                         | 122              | 140             | 262            |         |
| Mean (SD)                                 | 72.5 (28.2)      | 79.6 (34.0)     | 76.3 (31.5)    | 0.0681  |

Note: P-values computed using a Chi-square or Fisher's Exact Test for categorical variables and a T-Test for continuous variables.
